# Supplementary material
Source: PubMed Central journal article supplement (PMC2704877)
Supplement: supp_122_14_2371__5.pdf [file supp_122_14_2371__5.pdf]

**Table S1. Mass spectrometry analysis of GFP-rab native IPs**

| Candidate<br>(NCBI accn#)                         | MALDI-MS data                |                     |                               | Supporting tandem MS data                        |                               |                     |                             |                                           |
|---------------------------------------------------|------------------------------|---------------------|-------------------------------|--------------------------------------------------|-------------------------------|---------------------|-----------------------------|-------------------------------------------|
|                                                   | Peptide matches <sup>A</sup> | Sequence coverage % | Mascot PMF Score <sup>B</sup> | Peptide Ion mass/charge ratio [MH <sup>+</sup> ] |                               | Amino Acid Residues | Sequence                    | Mascot Individual Ions Score <sup>B</sup> |
|                                                   |                              |                     |                               | Observed                                         | Expected from Database Record |                     |                             |                                           |
| 1. RAB9, member RAS oncogene family (gil9790227)  | 7/27                         | 43                  | 154/76                        | 2447.108                                         | 2447.122                      | 48 - 68             | K.DLEVDGHFVTMQIWDTAGQER.F   | 119/46                                    |
|                                                   |                              |                     |                               | 1479.846                                         | 1479.700                      | 157 - 170           | K.DSTNVAAAFEEAVR.R          | 20/46                                     |
|                                                   |                              |                     |                               | 1635.922                                         | 1635.801                      | 157 - 171           | K.DSTNVAAAFEEAVRR.I         | 26/46                                     |
|                                                   |                              |                     |                               | 1662.965                                         | 1662.849                      | 179 - 192           | R.SEHLIQTDTVNLHR.K          | 112/46                                    |
| 2. GDP dissociation inhibitor 2 (gil30582575)     | 24/50                        | 56                  | 154/76                        | 1402.741                                         | 1402.707                      | 56 - 68             | R.FKIPGSPPEMGR.G            | 15/46                                     |
|                                                   |                              |                     |                               | 1125.627                                         | 1125.590                      | 90 - 98             | K.MLLYTEVTR.Y               | 16/46                                     |
|                                                   |                              |                     |                               | 1916.838                                         | 1916.826                      | 194 - 208           | R.TDDYLDQP(PamC)YETINR.I    | 63/46                                     |
|                                                   |                              |                     |                               | 2141.113                                         | 2141.099                      | 222 - 240           | K.SPYLYPLYGLGELPQGFAR.L     | 43/46                                     |
|                                                   |                              |                     |                               | 2213.085                                         | 2213.065                      | 310 - 328           | K.NTNDANS(PamC)QIIPQNQVNR.K | 27/46                                     |
|                                                   |                              |                     |                               | 1778.022                                         | 1777.999                      | 365 - 379           | K.EIRPALELLEPIEQK.F         | 21/46                                     |
|                                                   |                              |                     |                               | 1365.724                                         | 1365.694                      | 391 - 402           | K.DLGTESQIFISR.T            | 74/46                                     |
| 3. VPS26A (gil3342000)                            | n/a                          | n/a                 | n/a                           | 1313.730                                         | 1313.699                      | 94 - 105            | K.ELALPGELTQSR.S            | 9/46                                      |
|                                                   |                              |                     |                               | 923.569                                          | 923.564                       | 195 - 201           | K.IYFLLVR.I                 | 2/46                                      |
|                                                   |                              |                     |                               | 1624.866                                         | 1624.814                      | 272 - 284           | R.YFLNLVLVDEEDR.S           | 10/46                                     |
|                                                   |                              |                     |                               | 1085.624                                         | 1085.603                      | 289 - 296           | K.QQEILWR.K                 | 10/46                                     |
| 4. GDP dissociation inhibitor 2 (gil30582575)     | 25/47                        | 64                  | 175/76                        | 1402.755                                         | 1402.707                      | 56 - 68             | R.FKIPGSPPEMGR.G            | 18/46                                     |
|                                                   |                              |                     |                               | 1916.861                                         | 1916.826                      | 194 - 208           | R.TDDYLDQP(PamC)YETINR.I    | 38/46                                     |
|                                                   |                              |                     |                               | 2213.075                                         | 2213.065                      | 310 - 328           | K.NTNDANS(PamC)QIIPQNQVNR.K | 16/46                                     |
|                                                   |                              |                     |                               | 1778.052                                         | 1777.999                      | 365 - 379           | K.EIRPALELLEPIEQK.F         | 21/46                                     |
|                                                   |                              |                     |                               | 1365.732                                         | 1365.694                      | 391 - 402           | K.DLGTESQIFISR.T            | 40/46                                     |
| 5. RAB7, member RAS oncogene family (gil56269740) | 17/35                        | 76                  | 152/76                        | 1647.854                                         | 1647.809                      | 56 - 69             | R.LVTMQIWDTAGQER.F          | 83/46                                     |
|                                                   |                              |                     |                               | 1187.641                                         | 1187.613                      | 70 - 79             | R.FQSLGVAFYR.G              | 62/46                                     |

|                                                      |       |     |          |          |           |                   |                              |        |
|------------------------------------------------------|-------|-----|----------|----------|-----------|-------------------|------------------------------|--------|
|                                                      |       |     |          | 1934.001 | 1933.969  | 98 - 113          | K.TLDSWRDEFLIQASPR.D         | 21/46  |
|                                                      |       |     |          | 1175.621 | 1175.598  | 104 - 113         | R.DEFLIQASPR.D               | 86/46  |
|                                                      |       |     |          | 1475.777 | 1475.746  | 114 - 126         | R.DPENFPFVVLGNK.I            | 52/46  |
|                                                      |       |     |          | 1589.865 | 1589.821  | 158 - 171         | K.EAINVEQAFQTIAR.N           | 110/46 |
| 6. vacuolar sorting protein 35 (gil9622850)          | 14/39 | 21  | 54/76    | 1762.894 | 1762.853  | 500 - 514         | R.SEDPDQQYLILNTAR.K          | 28/46  |
| 7. choroideremia (Rab escort protein 1) (gil9966761) | n/a   | n/a | n/a      | 2474.214 | 2474.234  | 466 - 488         | K.TDSDQQISILTVPAEEPQTFAVR.V  | 26/46  |
| 8. GDP dissociation inhibitor 2 (gil30582575)        | 30/48 | 65  | 206/76   | 1402.726 | 1402.707  | 56 - 68           | R.FKIPGSPPEMGR.G             | 46/46  |
|                                                      |       |     |          | 1312.707 | 1312.694  | 69 - 79           | R.GRDWNVDLIPK.F              | 35/46  |
|                                                      |       |     |          | 1125.608 | 1125.590  | 90 - 98           | K.MLLYTEVTR.Y                | 16/46  |
|                                                      |       |     |          | 1344.671 | 1344.676  | 143 - 153         | K.FLVYVANFDEK.D              | 59/46  |
|                                                      |       |     |          | 1916.834 | 1916.826  | 194 - 208         | R.TDDYLDQP(PamC)YETINR.I     | 80/46  |
|                                                      |       |     |          | 938.501  | 938.494   | 211 - 218         | K.LYSESLAR.Y                 | 21/46  |
|                                                      |       |     |          | 2141.113 | 2140.099  | 222 - 240         | K.SPYLYPLYGLGELPQGFAR.L      | 107/46 |
|                                                      |       |     |          | 2213.080 | 2213.065  | 310 - 328         | K.NTNDANS(PamC)QIIPQNQVNR.K  | 47/46  |
|                                                      |       |     |          | 1778.009 | 1777.999  | 365 - 379         | K.EIRPALELLEPIEQK.F          | 30/46  |
|                                                      |       |     |          | 1365.710 | 1365.694  | 391 - 402         | K.DLGTESQIFISR.T             | 104/46 |
|                                                      |       |     | 1606.692 | 1606.680 | 424 - 436 | R.MTGSEFDPEEMKR.K | 59/46                        |        |
| 9. Rab5c protein (gil20988213)                       | 13/47 | 78  | 79/76    | 1351.662 | 1351.620  | 72 - 82           | K.FEIWDTAGQER.Y              | 77/46  |
|                                                      |       |     |          | 1300.644 | 1300.607  | 83 - 92           | R.YHSLAPMYR.G                | 57/46  |
|                                                      |       |     |          | 2026.037 | 2026.017  | 93 - 111          | R.GAQAAIVVYDITNTDTFAR.A      | 142/46 |
|                                                      |       |     |          | 2678.155 | 2678.222  | 143 - 166         | R.AVEFQEAQAYADDNSLLFMETSAK.T | 76/46  |
|                                                      |       |     |          | 1552.814 | 1552.779  | 167 - 180         | K.TAMNVNEIFMAIAK.K           | 72/46  |
|                                                      |       |     |          | 1181.584 | 1181.558  | 185 - 196         | K.NEPQNAAGAPGR.T             | 68/46  |
| 10. GDP dissociation inhibitor 1 (gil54696630)       | 17/31 | 48  | 123/76   | 1460.784 | 1460.713  | 56 - 68           | R.FQLLEGPPPEMGR.G            | 34/46  |
|                                                      |       |     |          | 1125.622 | 1125.590  | 90 - 98           | K.MLLYTEVTR.Y                | 24/46  |
|                                                      |       |     |          | 1468.727 | 1468.666  | 157 - 169         | K.TFEGVDPQTSMR.D             | 18/46  |
|                                                      |       |     |          | 1852.885 | 1852.831  | 194 - 208         | R.TDDYLDQP(PamC)LETVNR.I     | 81/46  |
|                                                      |       |     |          | 2213.082 | 2213.065  | 310 - 328         | K.NTNDANS(PamC)QIIPQNQVNR.K  | 18/46  |
|                                                      |       |     |          | 1361.633 | 1361.5791 | 424 - 435         | R.MAGTAFDFENMK.R             | 66/46  |

| Candidate<br>(NCBI accn#)                          | MALDI-MS data                |                     |                               | Supporting tandem MS data                        |                               |                     |                             |                                           |
|----------------------------------------------------|------------------------------|---------------------|-------------------------------|--------------------------------------------------|-------------------------------|---------------------|-----------------------------|-------------------------------------------|
|                                                    | Peptide matches <sup>A</sup> | Sequence coverage % | Mascot PMF Score <sup>B</sup> | Peptide Ion mass/charge ratio [MH <sup>+</sup> ] |                               | Amino Acid Residues | Sequence                    | Mascot Individual Ions Score <sup>B</sup> |
|                                                    |                              |                     |                               | Observed                                         | Expected from Database Record |                     |                             |                                           |
| 11. VPS26A (gil3342000)                            | 6/20                         | 21                  | 59/77                         | nd <sup>C</sup>                                  | nd                            | nd                  | nd                          | nd                                        |
| 12. RAB7, member RAS oncogene family (gil56269740) | 6/16                         | 33                  | 72/76                         | 1187.559                                         | 1187.613                      | 70 - 79             | R.FQSLGVAFYR.G              | 48/46                                     |
|                                                    |                              |                     |                               | 1933.855                                         | 1933.969                      | 98 - 113            | K.TLDSWRDEFLIQASPR.D        | 21/46                                     |
|                                                    |                              |                     |                               | 1175.550                                         | 1175.598                      | 104 - 113           | R.DEFLIQASPR.D              | 36/46                                     |
|                                                    |                              |                     |                               | 1589.739                                         | 1589.821                      | 158 - 171           | K.EAINVEQAFQTIAR.N          | 82/46                                     |
|                                                    |                              |                     |                               | 1632.753                                         | 1632.842                      | 56 - 69             | R.LVTMQIWDTAG[L]JER.F       | bi <sup>D</sup>                           |
| 13. RAB7, member RAS oncogene family (gil56269740) | 12/30                        | 63                  | 128/76                        | 1647.732                                         | 1647.809                      | 56 - 69             | R.LVTMQIWDTAG[Q]JER.F       | 55/46                                     |
|                                                    |                              |                     |                               | 1663.716                                         | 1663.804                      | 56 - 69             | R.LVT(MetOx)QIWDTAG[Q]JER.F | 17/46                                     |
|                                                    |                              |                     |                               | 1187.554                                         | 1187.613                      | 70 - 79             | R.FQSLGVAFYR.G              | 68/46                                     |
|                                                    |                              |                     |                               | 1933.883                                         | 1933.969                      | 98 - 113            | K.TLDSWRDEFLIQASPR.D        | 26/46                                     |
|                                                    |                              |                     |                               | 1175.544                                         | 1175.598                      | 104 - 113           | R.DEFLIQASPR.D              | 38/46                                     |
|                                                    |                              |                     |                               | 1589.742                                         | 1589.821                      | 158 - 171           | K.EAINVEQAFQTIAR.N          | 99/46                                     |
| 14. GDP dissociation inhibitor 1 (gil54696630)     | 22/30                        | 48                  | 256/76                        | 1027.554                                         | 1027.539                      | 104 - 112           | K.VVEGSFVYK.G               | 19/46                                     |
|                                                    |                              |                     |                               | 1654.747                                         | 1654.804                      | 143 - 156           | K.FLVFVANFDENDPK.T          | 64/46                                     |
|                                                    |                              |                     |                               | 1852.784                                         | 1852.831                      | 194 - 208           | R.TDDYLDQP(PamC)LETVNR.I    | 48/46                                     |
|                                                    |                              |                     |                               | 2141.095                                         | 2141.099                      | 222 - 240           | K.SPPLYPLYGLGELPQGFAR.L     | 27/46                                     |
|                                                    |                              |                     |                               | 1722.842                                         | 1722.909                      | 366 - 380           | K.EVEPALELLEPIDQK.F         | 39/46                                     |
| 15. vacuolar sorting protein 35 (gil9622850)       | 9/19                         | 14                  | 73/76                         | nd <sup>C</sup>                                  | nd                            | nd                  | nd                          | nd                                        |
| 16. vacuolar sorting protein 35 (gil9622850)       | 11/22                        | 15                  | 89/76                         | nd <sup>C</sup>                                  | nd                            | nd                  | nd                          | nd                                        |
