# Supplementary material
Source: PubMed Central journal article supplement (PMC2704877)
Supplement: supp_122_14_2371__6.pdf [file supp_122_14_2371__6.pdf]

**Table S2. Identification of the retromer interacting protein, TBC1D5**

| Candidate<br>(NCBI accn#)                       | MALDI-MS data                   |                           |                                     | Supporting tandem MS data                              |                                        |                           |                          |                                                    |
|-------------------------------------------------|---------------------------------|---------------------------|-------------------------------------|--------------------------------------------------------|----------------------------------------|---------------------------|--------------------------|----------------------------------------------------|
|                                                 | Peptide<br>matches <sup>A</sup> | Sequence<br>coverage<br>% | Mascot<br>PMF<br>Score <sup>B</sup> | Peptide Ion mass/charge<br>ratio<br>[MH <sup>+</sup> ] |                                        | Amino<br>Acid<br>Residues | Sequence                 | Mascot<br>Individual<br>Ions<br>Score <sup>B</sup> |
|                                                 |                                 |                           |                                     | Observed                                               | Expected<br>from<br>Database<br>Record |                           |                          |                                                    |
| 1. TBC1D5 (gil15341918)                         | 38/94                           | 44                        | 237/76                              | 2139.068                                               | 2139.080                               | 57 - 73                   | R.KEWEELFVNNNYLATIR.Q    | 23/45                                              |
|                                                 |                                 |                           |                                     | 2010.976                                               | 2010.985                               | 58 - 73                   | K.EWEELFVNNNYLATIR.Q     | 105/45                                             |
|                                                 |                                 |                           |                                     | 1800.826                                               | 1800.830                               | 170 - 183                 | R.TFPQMFFQENVR.K         | 89/45                                              |
|                                                 |                                 |                           |                                     | 1272.727                                               | 1272.724                               | 323 - 333                 | R.LEIAPQIYGLR.W          | 43/45                                              |
|                                                 |                                 |                           |                                     | 1106.593                                               | 1106.588                               | 457 - 466                 | K.VSNLINFGR.K            | 78/45                                              |
|                                                 |                                 |                           |                                     | 2101.999                                               | 2102.005                               | 499 - 516                 | R.TSAEAPSHHLQQQQQQQR.L   | 102/45                                             |
|                                                 |                                 |                           |                                     | 1147.583                                               | 1147.578                               | 729 - 739                 | R.GSFGQAQPLR.T           | 56/45                                              |
| 2. Vacuolar protein sorting 35<br>(gil17999541) | 54/105                          | 59                        | 338/76                              | 1127.576                                               | 1127.555                               | 45 - 54                   | K.HASNMLGELR.T           | 70/45                                              |
|                                                 |                                 |                           |                                     | 1243.682                                               | 1243.659                               | 227 - 237                 | R.LSQLEGVNVER.Y          | 62/45                                              |
|                                                 |                                 |                           |                                     | 1852.006                                               | 1851.989                               | 324 - 339                 | K.LFDIFSQQVATVIQSR.Q     | 64/45                                              |
|                                                 |                                 |                           |                                     | 1886.841                                               | 1886.842                               | 420 - 433                 | K.HFHPLFEYFDYESR.K       | 24/45                                              |
|                                                 |                                 |                           |                                     | 1762.871                                               | 1762.853                               | 500 - 514                 | R.SEDPDQQYLILNTAR.K      | 103/45                                             |
|                                                 |                                 |                           |                                     | 943.467                                                | 943.442                                | 516 - 524                 | K.HFGAGGNQR.I            | 58/45                                              |
|                                                 |                                 |                           |                                     | 1616.946                                               | 1616.930                               | 623 - 637                 | K.AQLAAITLIIGTFER.M      | 76/45                                              |
|                                                 |                                 |                           |                                     | 2244.101                                               | 2244.092                               | 750 - 768                 | K.IREDLPNLESSEETEIQINK.H | 55/45                                              |
|                                                 |                                 |                           |                                     | 1303.675                                               | 1303.659                               | 769 - 778                 | K.HFHNTLEHLR.L           | 76/45                                              |
| 3. VPS26B (gil30023568)                         | 17/45                           | 38                        | 85/76                               | 923.592                                                | 923.564                                | 193 - 199                 | K.IYFLLVR.I              | 15/45                                              |
|                                                 |                                 |                           |                                     | 1668.864                                               | 1668.841                               | 270 - 282                 | R.YYLNVLIDEER.R          | 58/45                                              |
|                                                 |                                 |                           |                                     | 1057.599                                               | 1057.572                               | 287 - 294                 | K.QQEVVLR.K              | 33/45                                              |
|                                                 |                                 |                           |                                     | 1195.610                                               | 1195.588                               | 314 - 324                 | R.FEGTSLGEVR.T           | 65/45                                              |
| 4. VPS26A (gil3342000)                          | 24/71                           | 66                        | 109/76                              | 1313.816                                               | 1313.699                               | 94 - 105                  | K.ELALPGELTQSR.S         | 58/45                                              |
