# Supplementary material
Source: PubMed Central journal article supplement (PMC2704877)

5 nm = anti-VPS26, 10 nm = anti-GFP.

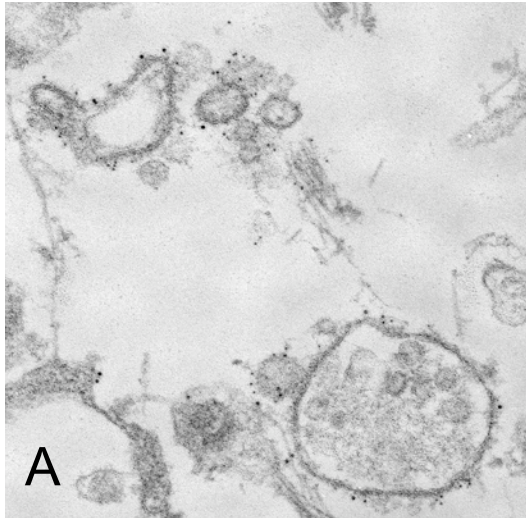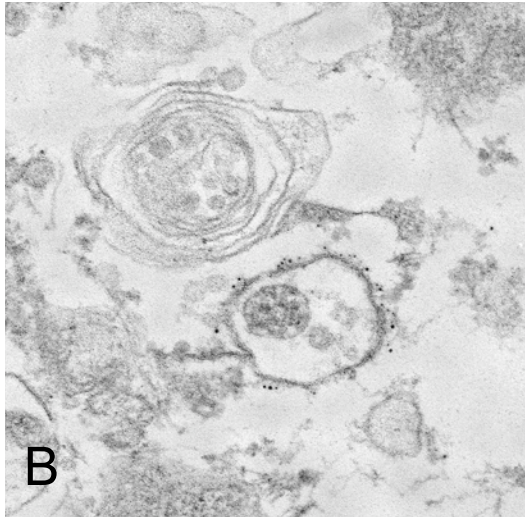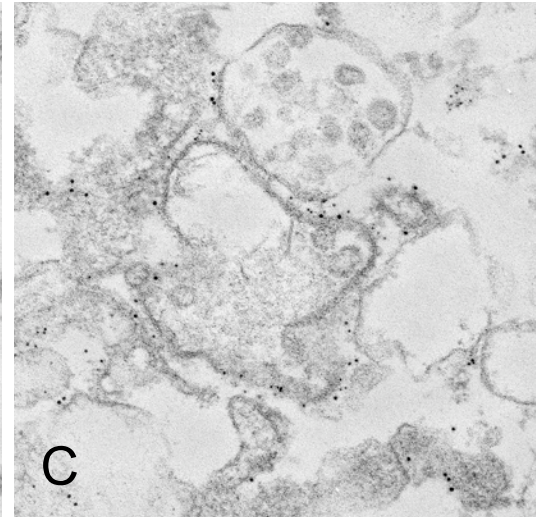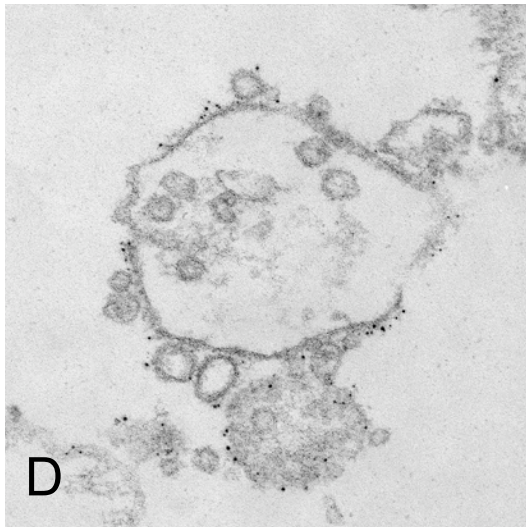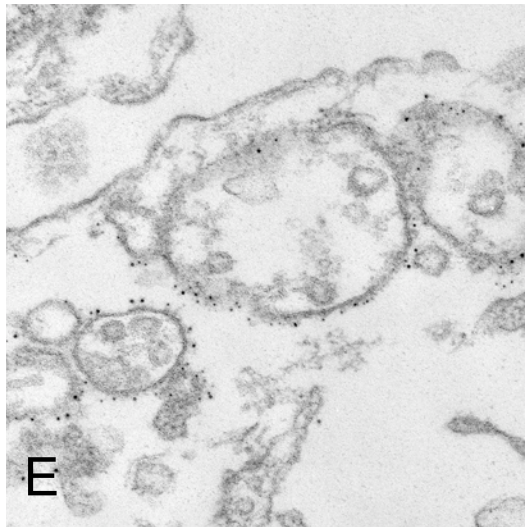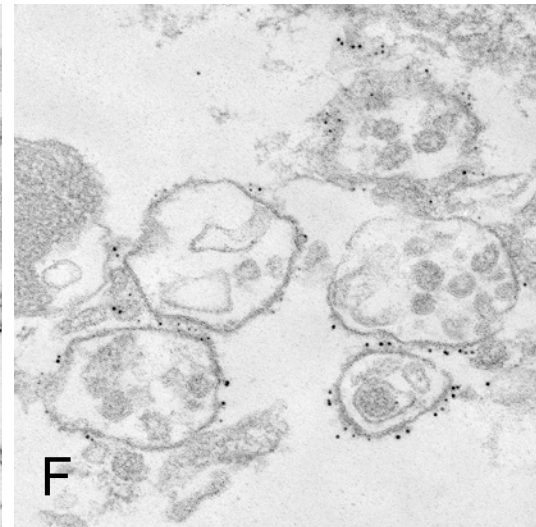

Supplement: supp_122_14_2371__1.pdf [file supp_122_14_2371__1.pdf]

GFP-rab7

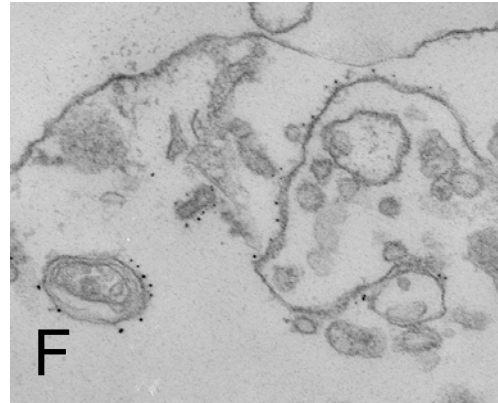

GFP-rab7K157N

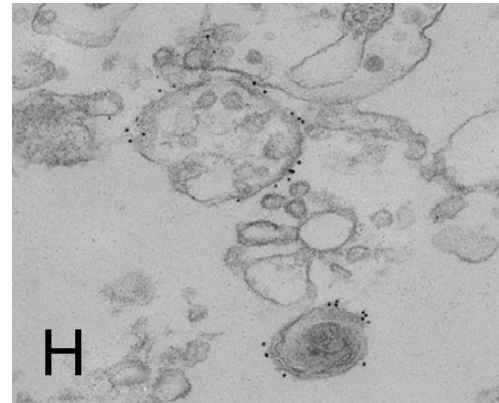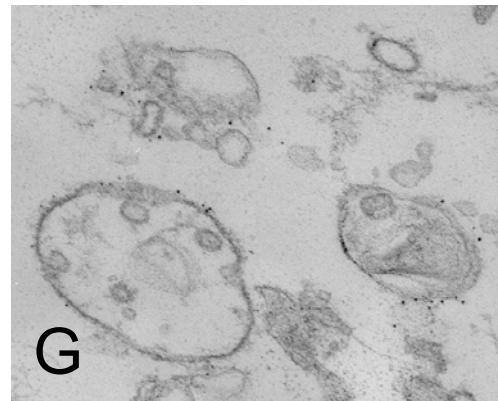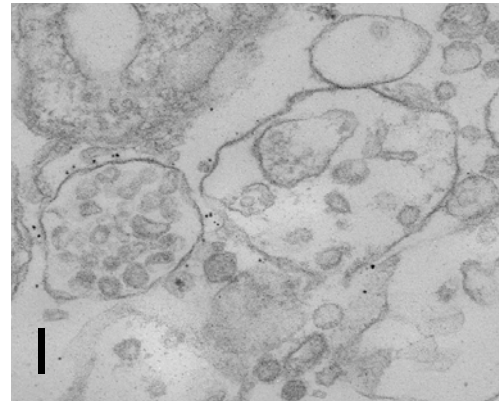

Supplement: supp_122_14_2371__2.pdf [file supp_122_14_2371__2.pdf]

VPS29-GFP

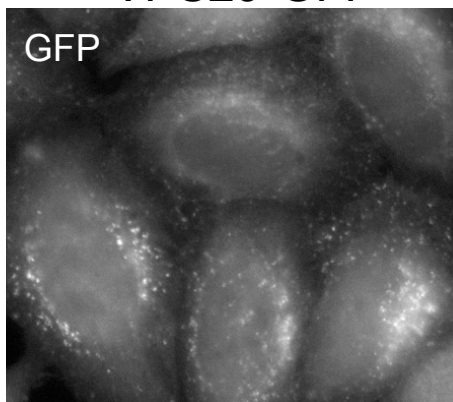

Hrs-1-GFP

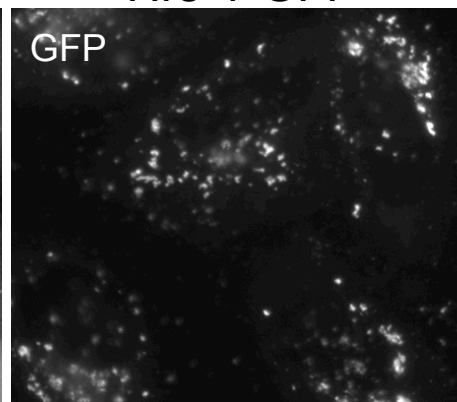

VPS26

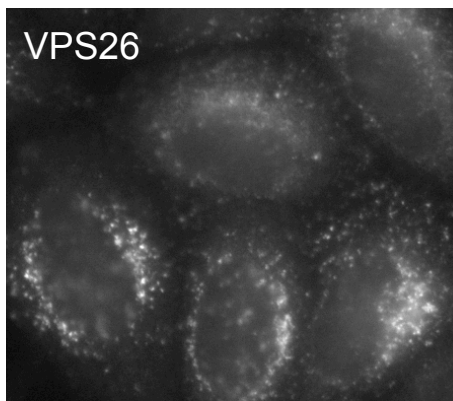

VPS26

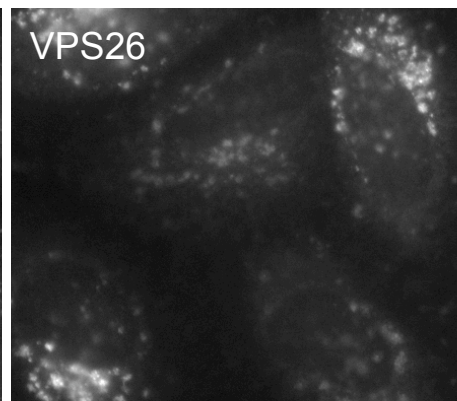

RFP-TBC1D5

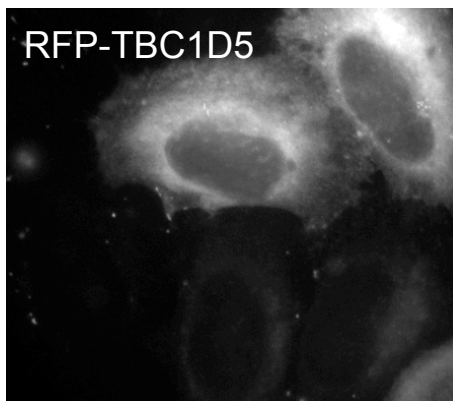

RFP-TBC1D5

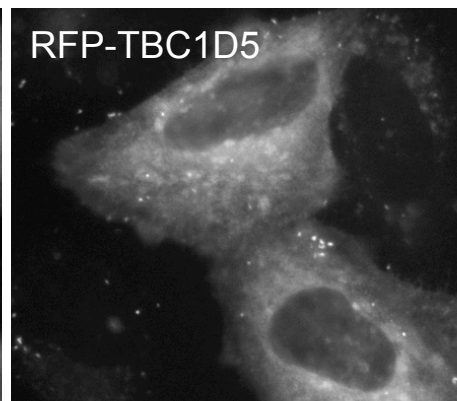

Supplement: supp_122_14_2371__3.pdf [file supp_122_14_2371__3.pdf]

control

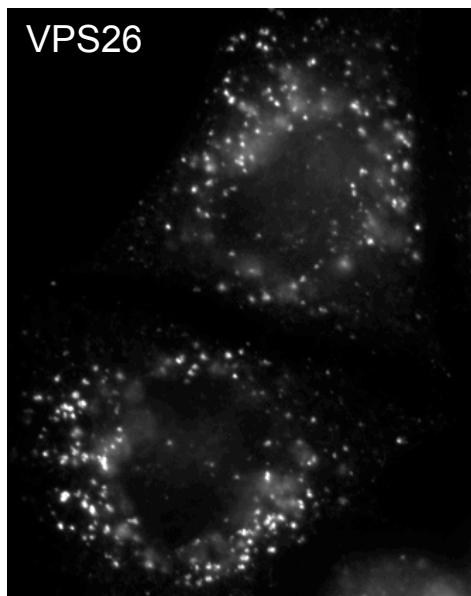

100 nM wortmannin

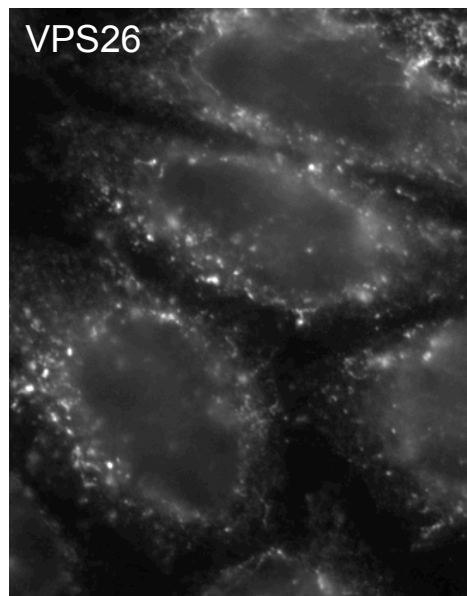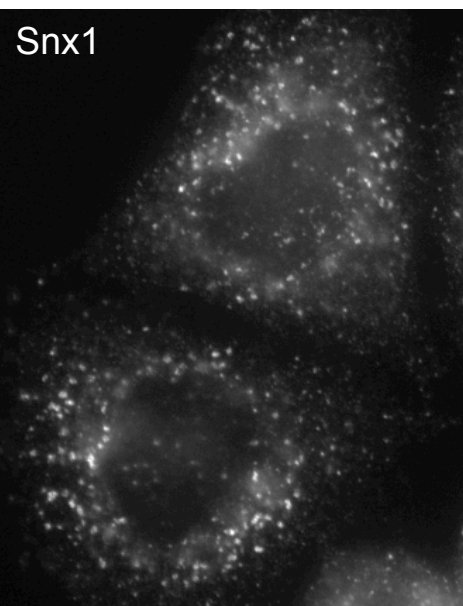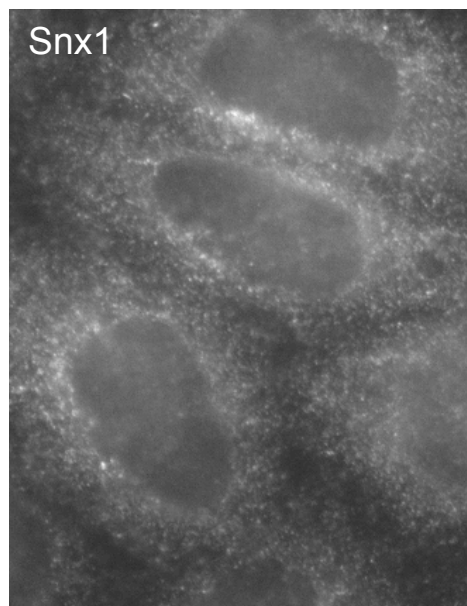

Supplement: supp_122_14_2371__4.pdf [file supp_122_14_2371__4.pdf]
